# Supplementary material for: The Software Ontology (SWO): a resource for reproducibility in biomedical data analysis, curation and digital preservation
Source: Springer Nature journal article supplement (doi:10.1186/2041-1480-5-25), 2014-06-02

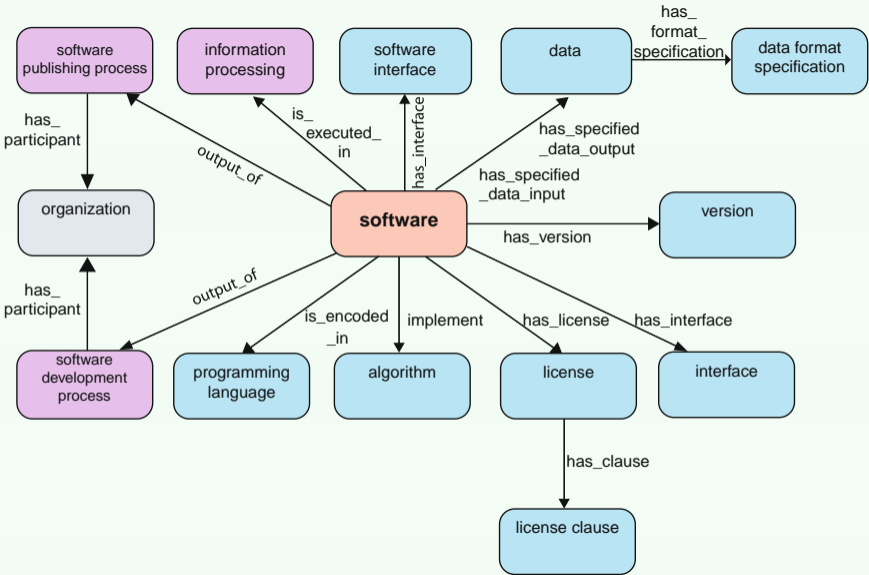

Supplement: 13326_2013_176_MOESM1_ESM.pdf [file 13326_2013_176_MOESM1_ESM.pdf]
