# Supplementary material for: The Software Ontology (SWO): a resource for reproducibility in biomedical data analysis, curation and digital preservation
Source: Springer Nature journal article supplement (doi:10.1186/2041-1480-5-25), 2014-06-02
Supplement: 13326_2013_176_MOESM2_ESM.pdf [file 13326_2013_176_MOESM2_ESM.pdf]

swo\_core.owl

**software**

information  
processing

programming  
language

swo\_organizations.owl

organization

software  
development  
process

software publishing  
process

swo\_licenses.owl

license

license clause

swo\_data.owl

data

data format  
specification

swo\_interface.owl

interface

swo\_algorithms.owl

algorithm

swo\_versions.owl

version
